# Supplementary material for: Tumor Environment-Responsive Hyaluronan Conjugated Zinc Protoporphyrin for Targeted Anticancer Photodynamic Therapy
Source: MDPI journal article supplement (doi:10.3390/jpm11020136), 2021-02-17
Supplement: s1 [file s1]

Research Article

# Tumor Environment-Responsive Hyaluronan Conjugated Zinc Protoporphyrin for Targeted Anticancer Photodynamic Therapy

## Supplemental data

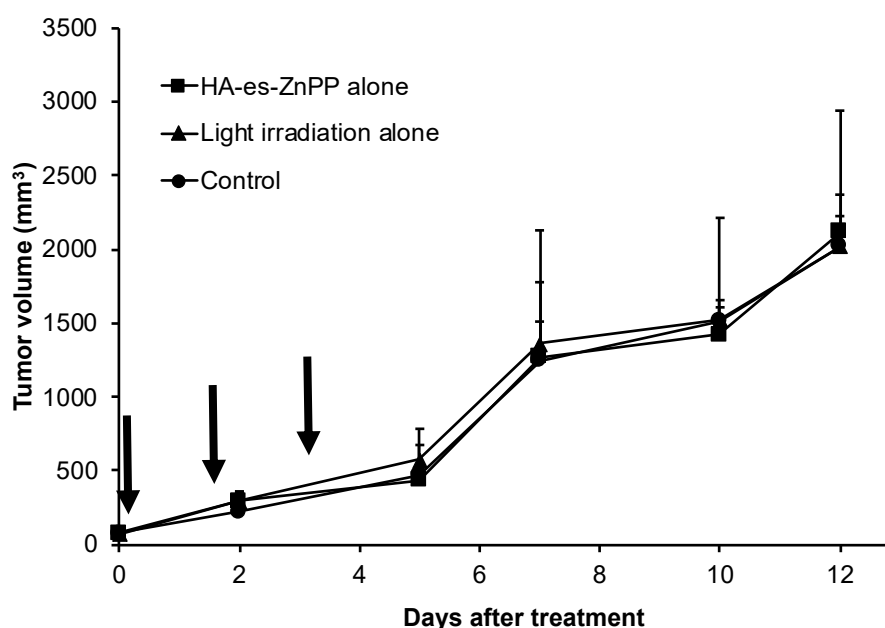

**Figure S1.** HA-es-ZnPP alone or light irradiation alone did not significant suppression of growth of mouse sarcoma S180 solid tumors. The dosing of HA-es-ZnPP and light irradiation, as well as therapeutic protocol were the same as that shown in Figure 7. Three injections were carried out for HA-es-ZnPP. In light irradiation alone group, physiological saline was injected instead of HA-es-ZnPP. Arrows indicate injection of drugs or light irradiation. Data are mean  $\pm$  SD.
